# Supplementary material for: Ordering Behavior Under Supply Risk:An Experimental Investigation
Source: Atypon-hosted journal article supplement (doi:10.1287/msom.2013.0453), 2013-10-25
Supplement: msom.2013.0453-sm.pdf [file msom.2013.0453-sm.pdf]

# Online Appendix for: Ordering Behavior under Supply Risk: An Experimental Investigation

## 1 Online Supplement

### 1.1 Proof of Proposition 1

*Proof.* It can be easily shown that  $\Pi(q_u, q_r)$  is jointly concave over  $q_u$  and  $q_r$ . Define:  $Z(x) = \int_0^x \alpha f(\alpha) d\alpha$ .

First order derivative of the buyer's profit function yields the following:

$$\begin{aligned}\frac{\partial \Pi}{\partial q_u} &= -(1 - p_d) \left[ c_u E(\alpha) - pZ\left(\frac{D - q_r}{q_u}\right) \right] \\ \frac{\partial \Pi}{\partial q_r} &= -c_r + p_d p + (1 - p_d) F\left(\frac{D - q_r}{q_u}\right)\end{aligned}$$

The optimal solution can then be derived from the first order derivatives.

$$\begin{aligned}\frac{\partial \Pi}{\partial q_u} = 0 &\implies Z\left(\frac{D - q_r}{q_u}\right) = \frac{c_u E(\alpha)}{p} \\ \frac{\partial \Pi}{\partial q_r} = 0 &\implies F\left(\frac{D - q_r}{q_u}\right) = \frac{p_d p - c_r}{(1 - p_d)p}\end{aligned}$$

Thus, only one of the order quantities is non-negative. When  $q_u = 0$ , we have  $q_r^* = D$  and  $\Pi_r^* = (p - c_r)D$ ; when  $q_r = 0$ ,  $q_u^*$  is the solution of  $Z(D/q_u) = \frac{c_u E(\alpha)}{p}$ , i.e.,  $q_u^*$  is independent of  $p_d$ , and the expected profit function is linear in  $p_d$ . Thus, there exists a threshold for  $p_d$  such that the buyer orders from supplier U only when the probability of disruption is below the threshold, and from the reliable supplier only when it exceeds it.

To continue the proof when the yield distribution is Uniform  $[1/2, 1]$ , note that

$$\begin{aligned}\frac{\partial \Pi}{\partial q_u} &= (1 - p_d) \left[ (p) \left(\frac{D - q_r}{q_u}\right)^2 - \frac{3c_u + p}{4} \right] \\ \frac{\partial \Pi}{\partial q_r} &= 2(1 - p_d)(p) \left(\frac{D - q_r}{q_u}\right) - c_r - p + 2p_d p\end{aligned}$$

The optimal solution can be derived from the first order derivatives.

$$\begin{aligned}
\frac{\partial \Pi}{\partial q_u} = 0 &\implies \left(\frac{D - q_r}{q_u}\right)^2 = \frac{3c_u + p}{4(p + c_h)} \\
\frac{\partial \Pi}{\partial q_r} = 0 &\implies \left(\frac{D - q_r}{q_u}\right) = \frac{c_r + p - 2p_d p}{2(1 - p_d)p}
\end{aligned} \tag{1}$$

When  $q_u = 0$ , obviously  $q_r^* = D$  and  $\Pi_r^* = (p - c_r) D$ ; When  $q_r = 0$ , we have  $q_u^* = 2D\sqrt{\frac{p}{p+3c_u}}$ . The optimal profit in that case is

$$\Pi_u^* = D(p + (1 - 2p_d)p) - (1 - p_d)(p + 3c_u)D\sqrt{\frac{p}{p + 3c_u}} \tag{2}$$

Taking the first order derivative of buyer's optimal profit over the disruption probability  $p_d$ , we have,

$$\frac{d\Pi_u^*}{dp_d} = -D(2p - \sqrt{p(3c_u + p)}) \leq 0$$

The above inequality is due to the fact that  $(2p)^2 - p(3c_u + p) = 3(p - c_u)p \geq 0$ . Since  $\Pi_r^*$  is independent of  $p_d$ ,  $\hat{p}_d$  can be determined by solving  $p_d$  from equation  $\Pi_u^* = \Pi_r^*$ , which leads to

$$\hat{p}_d = \frac{(c_r + p)\sqrt{p} - p\sqrt{p + 3c_u}}{2p\sqrt{p} - p\sqrt{p + 3c_u}}$$

□

## 1.2 Academic Background

Subjects were separated into two groups based on whether or not they indicated awareness of diversification principles from prior Finance courses. Table 1 summarizes our findings. First, we find that regardless of their prior knowledge from Finance education, they have diversification ratios that are significantly different from the theoretical optimal levels. Further, we also find that in 5 of the 6 settings, the differences between paid and unpaid subjects are not significant. Columns 3 and 4 in the table (resp., columns 5 and 6) provide the diversification ratios and the  $p$  values for the comparisons with theoretically optimal levels for subjects with (resp., without) prior familiarity with diversification. In column 7, we provide the  $p$  values obtained by comparing the  $DR_E$  values for the two groups of subjects, which suggest that they are not significantly different.

| Setting | $DR_T$ | With Familiarity |           | Without Familiarity |           | With vs. Without |
|---------|--------|------------------|-----------|---------------------|-----------|------------------|
|         |        | $DR_E$           | $p$ value | $DR_E$              | $p$ value | $p$ value        |
| LCZP    | 1      | 0.692            | 0.000     | 0.516               | 0.000     | 0.034            |
| LCLP    | 1      | 0.416            | 0.000     | 0.384               | 0.000     | 0.356            |
| LCHP    | 0      | 0.247            | 0.000     | 0.264               | 0.000     | 0.408            |
| HCZP    | 1      | 0.517            | 0.000     | 0.486               | 0.000     | 0.363            |
| HCLP    | 0      | 0.307            | 0.000     | 0.316               | 0.000     | 0.452            |
| HCHP    | 0      | 0.238            | 0.000     | 0.260               | 0.000     | 0.371            |

Table 1: Subjects With and Without Finance Familiarity

### 1.3 Analysis Based on Median Measure

Here we present comparisons between medians of experimental diversification ratios and profits, and their corresponding theoretical optimal values. In Table 2 below,  $DR_{EM}$  refers to the median diversification ratio among subjects for each setting. We present the results from the standard Mann-Whitney-Wilcoxon test ( $W(n)$ ) and the  $p$  values in the tables.

| Setting | $DR_T$ | $DR_{EM}$ | $W(n)$ | $p$ value |
|---------|--------|-----------|--------|-----------|
| LCZP    | 1      | 0.610     | 551.5  | 0.000     |
| LCLP    | 1      | 0.410     | 613.5  | 0.000     |
| LCHP    | 0      | 0.215     | 721.5  | 0.000     |
| HCZP    | 1      | 0.471     | 595.0  | 0.000     |
| HCLP    | 0      | 0.373     | 758.5  | 0.000     |
| HCHP    | 0      | 0.227     | 758.5  | 0.000     |

Table 2: Theoretical & Experimental Median Diversification Ratios

In Table 3, corresponding results are shown for the profits. Clearly, the median values of diversification ratios and profits from the experiment differ significantly from the optimal theoretical values.

| Setting | $\pi^*$ | $\pi_M$ | $W(n)$ | $p$ value |
|---------|---------|---------|--------|-----------|
| LCZP    | 2325.42 | 1864.40 | 496.00 | 0.000     |
| LCLP    | 1860.34 | 1561.83 | 595.00 | 0.000     |
| LCHP    | 1500.00 | 1431.75 | 342.50 | 0.000     |
| HCZP    | 1837.60 | 1611.30 | 595.00 | 0.000     |
| HCLP    | 1500.00 | 1476.09 | 529.00 | 0.000     |
| HCHP    | 1500.00 | 1375.37 | 612.00 | 0.000     |

Table 3: Theoretical & Experimental Median Expected Profits
